# Supplementary material for: Visible light-sensitive APTES-bound ZnO nanowire toward a potent nanoinjector sensing biomolecules in a living cell
Source: Royal Society of Chemistry journal article supplement (doi:10.1039/c3nr03042c), 2013-01-01
Supplement: c3nr03042c.pdf [file c3nr03042c.pdf]

## Supplementary Information

### Visible Light-Sensitive APTES-Bound ZnO Nanowire toward a Potent Nanoinjector Sensing Biomolecules in a Living Cell

By Jooran Lee<sup>a</sup>, Sunyoung Choi<sup>a</sup>, Seon Joo Bae<sup>b</sup>, Seok Min Yoon<sup>c</sup>, Joon Sig Choi<sup>b</sup> and Minjoong Yoon\*<sup>a</sup>

<sup>a</sup>Molecular/Nano Photochemistry and Photonics Lab, Department of Chemistry, Chungnam National University, Daejeon 305-764, South Korea, <sup>b</sup>Department of Biochemistry, College of Natural Sciences, Chungnam National University, Daejeon 305-764, South Korea, <sup>c</sup>Department of Chemistry, Northwestern University, Evanston, Illinois 60208, United States. \*e-mail: [mjyoon@cnu.ac.kr](mailto:mjyoon@cnu.ac.kr)

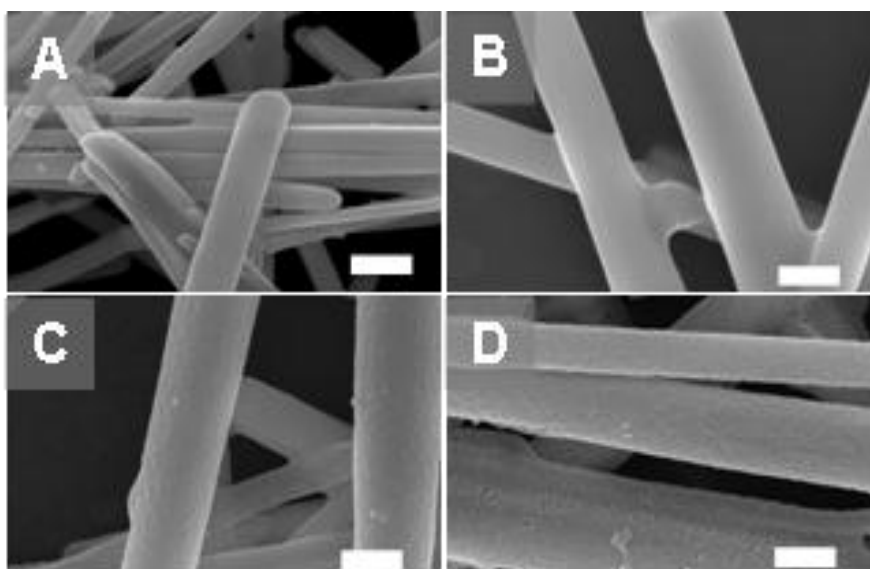

**Fig S1.** SEM images of ZnO NWs (A), APTES-ZnO NWs (B), ss DNA-APTES-ZnO NWs (C) and ds DNA-APTES-ZnO NWs (D). White scale bars indicate 400 nm.

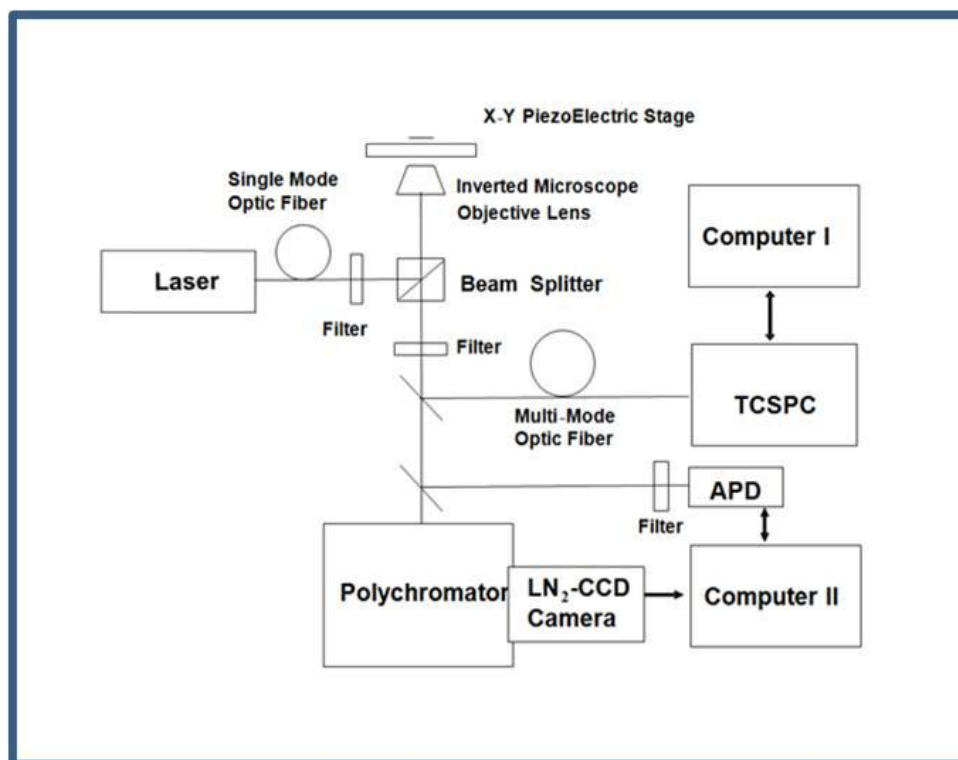

**Fig S2.** Layout of laser confocal scanning microscope (LCSM)-coupled spatial and ps-time-resolved PL system. The sample is mounted on a piezoelectric x, y scanning stage. Light from a laser is coupled onto the single-mode optical fiber, illuminating the sample through the objective lens.

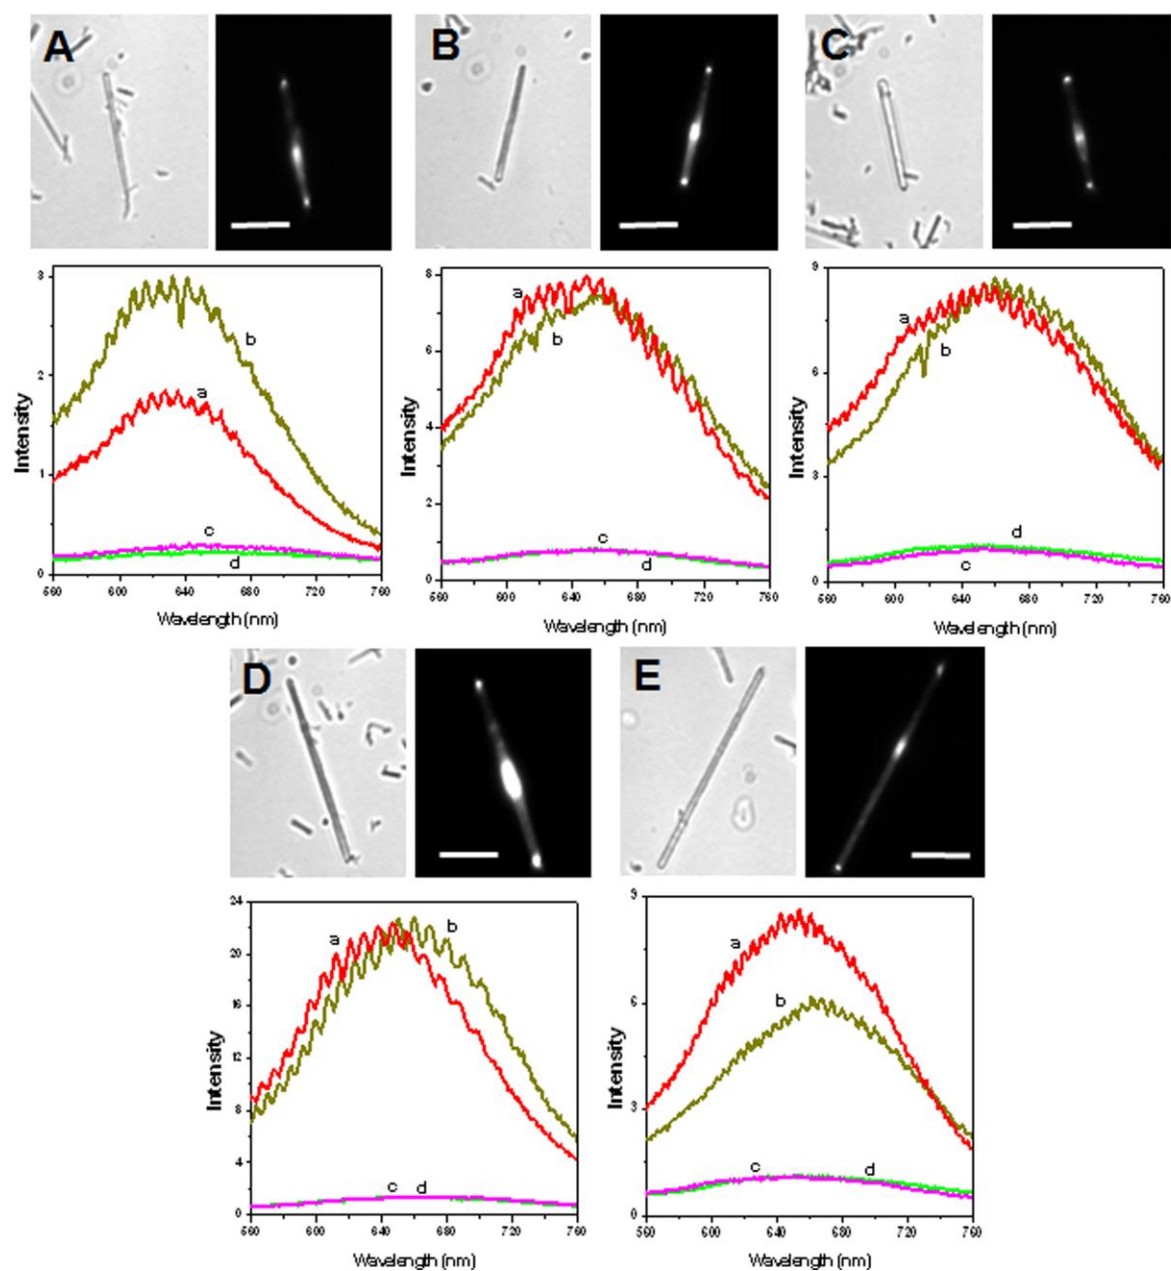

**Fig S3.** Bright-field and PL images of different single ZnO NWs. Emission spectra were collected from the tip and body of the selected single ZnO NW (A), APTES-ZnO NW (B), ss DNA-APTES-ZnO NW (C), complementary ds DNA-APTES-ZnO NW (D) and non-complementary ds NA-APTES-ZnO NW (E). Excitation wavelength was 410nm. (a): tip of the selected single ZnO NW (b): body of the selected single ZnO NW.

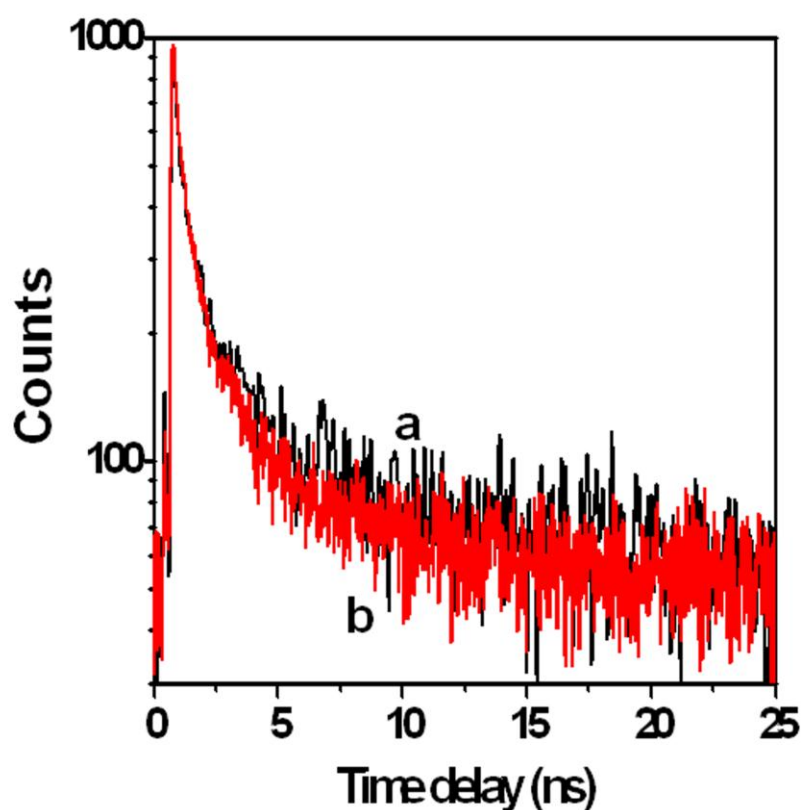

| $\lambda_{em}=650nm$ | $\tau_1(ns)$ (%) | $\tau_2(ns)$ (%) | $\tau$ (average) | $\chi^2$ |
|----------------------|------------------|------------------|------------------|----------|
| APTES-ZnO NWs        | 0.41 (25.2)      | 3.72 (74.8)      | 2.89             | 1.040    |
| dsDNA-APTES-ZnO NWs  | 0.47 (33.5)      | 3.02 (66.5)      | 2.17             | 1.050    |

**Fig S4.** PL decay profiles of APTES-ZnO NWs (a) and complementary *ds* DNA-APTES-ZnO NWs (b). The fluorescence decays were measured with 410 nm light by using time-correlated single photon counting method with a self- mode-locked femtosecond Ti:sapphire laser (Coherent model Mira 900) pumped by a Nd:YVO<sub>4</sub> laser (Coherent Verdi).

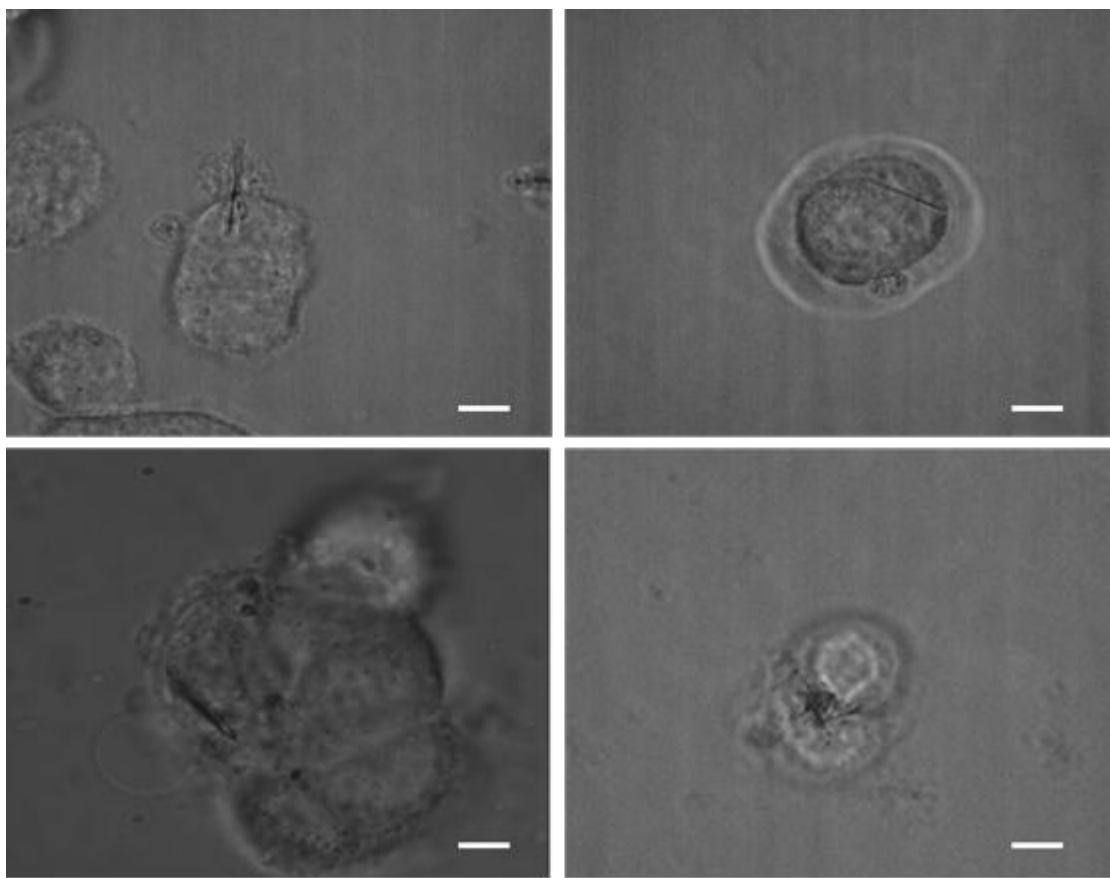

**Fig S5.** Bright-field confocal microscopic images of a single APTES-ZnO NW in 293 cell. The scale bar is 10μm.

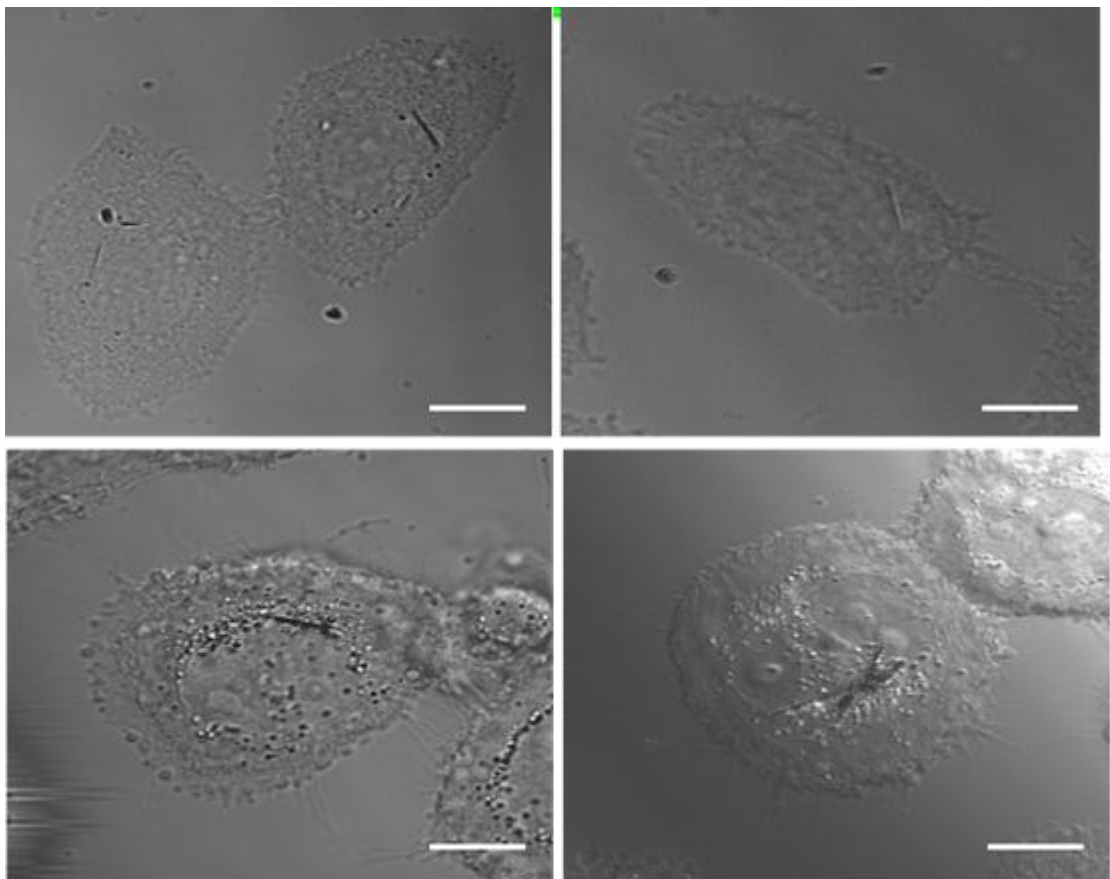

**Fig S6.** Bright-field confocal microscopic images of a single APTES-ZnO NW in HeLa cell. The scale bar is 10μm.

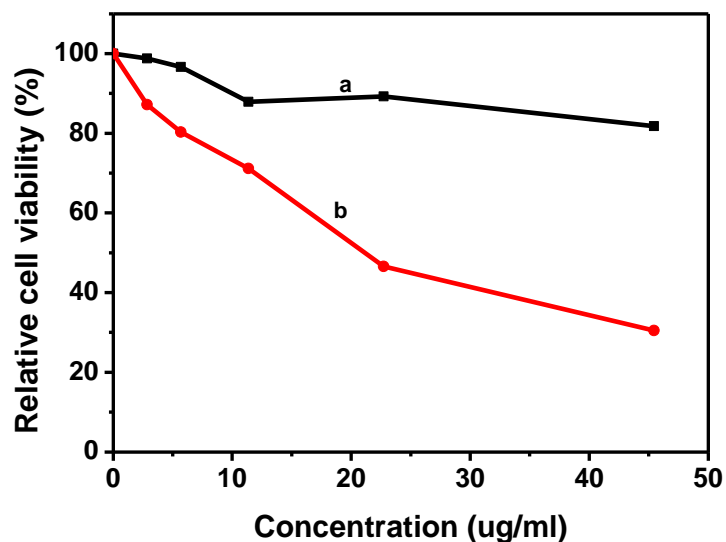

**Fig S7.** Effect of APTES-ZnO NWs on viability of HEK 293 cells which were seeded  $2 \times 10^4$  cells per well in a 96 well plate. After 24 hours seeding, the cells were exposed to the indicated concentrations of each carrier for 2 days. Relative cell viability was calculated, regarding the absorbance at 570 nm of intact HEK 293 cells as 100%. The absorbance is directly proportional to the number of living cells. (a) APTES-ZnO NWs, (b) PEI 25KDa.
